# Supplementary material for: Surface modification and characterization of waste derived carbon particles to reinforce photo-cured shape memory composites
Source: Royal Society of Chemistry journal article supplement (doi:10.1039/d1ra08331g), 2022-01-01
Supplement: d1ra08331g1.pdf [file d1ra08331g1.pdf]

## Surface Modification and Characterization of Waste Derived Carbon Particles to Reinforce Photo-Cured Shape Memory Composites

Muhammad Atif<sup>1</sup>\*, Muhammad Naeem<sup>1</sup>, Ramzan Abdul Karim<sup>2</sup>, Faiza Ameen<sup>3</sup>, Muhammad Waseem Mumtaaz<sup>4</sup>

<sup>1</sup> Department of Chemistry, University of Education Lahore, Vehari Campus, Punjab, Pakistan

<sup>2</sup> Faculty of Materials and Chemical Engineering, GIKI, Topi, Pakistan

<sup>3</sup> Department of Chemistry, Bahauddin Zakarya University Multan, Punjab, Pakistan

<sup>4</sup> Department of Chemistry, Faculty of Sciences, University of Gujrat, Punjab, Pakistan

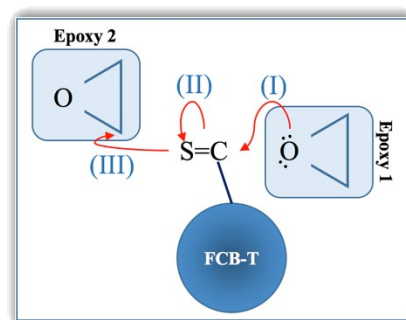

Scheme S1: Reaction of carbonyl sulfide with epoxy

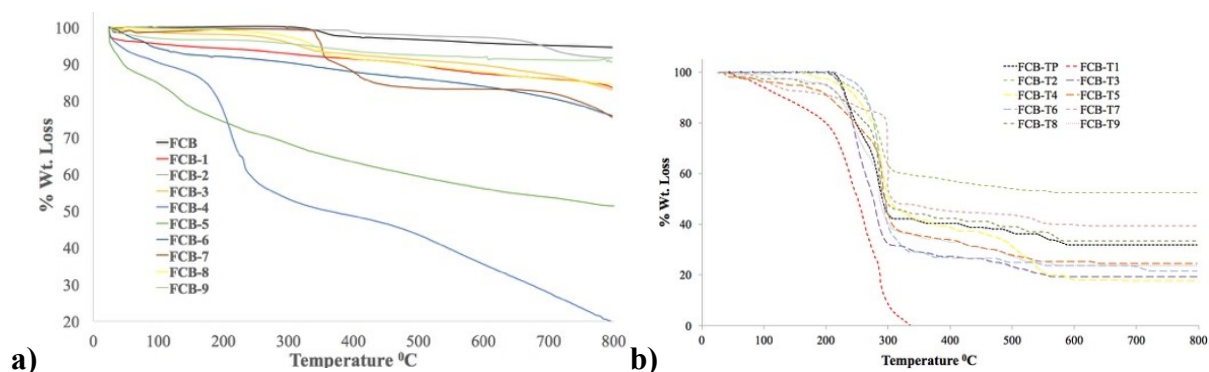

Figure S1: TGA of a) oxidized, b) thiolated FCB particles

\* Dr. Muhammad Atif, Department of Chemistry,  
University of Education Lahore, Vehari Campus, Punjab, Pakistan.  
Contact: 0092-3024757979; 0092-3320947978  
Email: [muhammad.atif@ue.edu.pk](mailto:muhammad.atif@ue.edu.pk); [chemistatif@yahoo.com](mailto:chemistatif@yahoo.com)

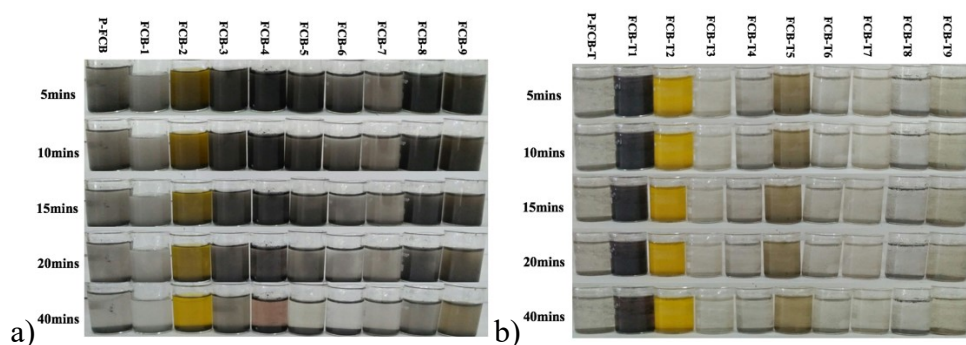

Figure S2: Water dispersion of a) unmodified and oxidized FCB, b) FCB-T particles

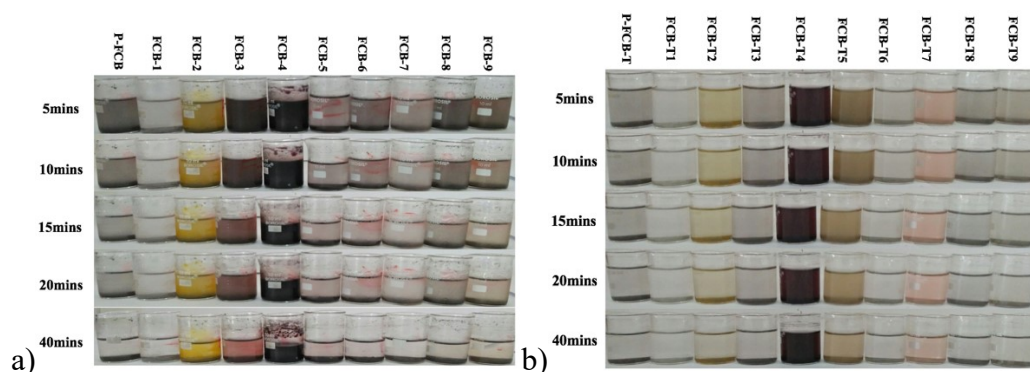

Figure S3: Acetone dispersion of a) unmodified and oxidized FCB, b) FCB-T particles

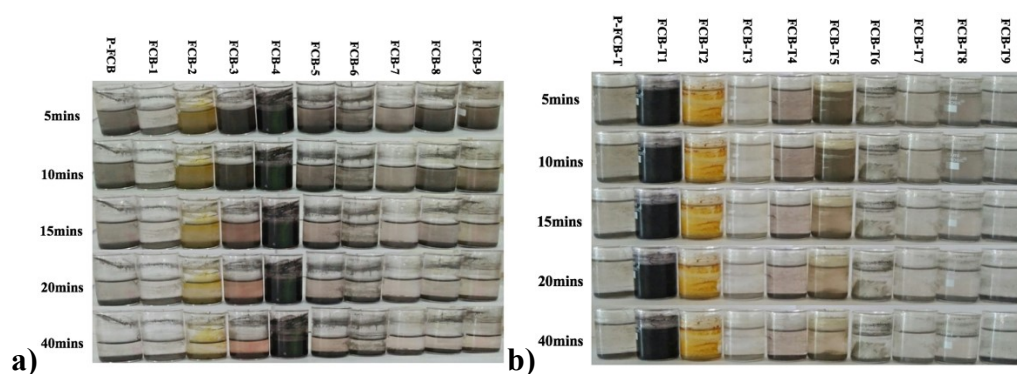

Figure S4: Ethyl acetate dispersion of a) unmodified and oxidized FCB, b) FCB-T particles

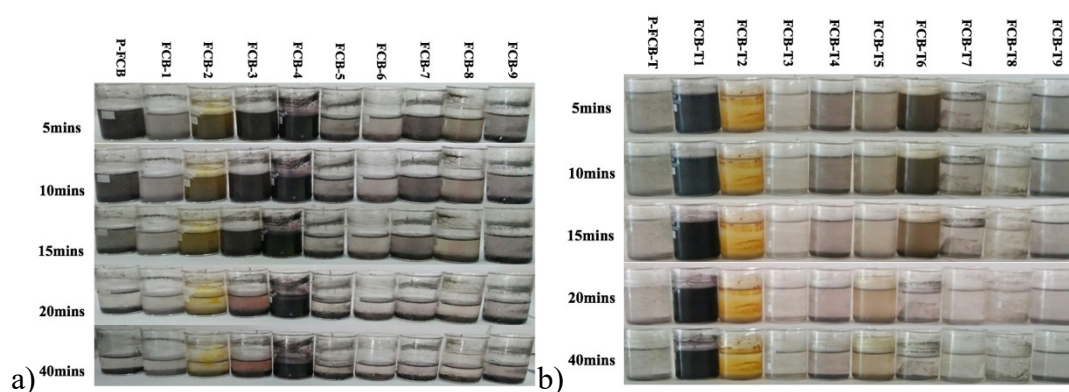

Figure S5: DCM dispersion of a) unmodified and oxidized FCB, b) FCB-T particles

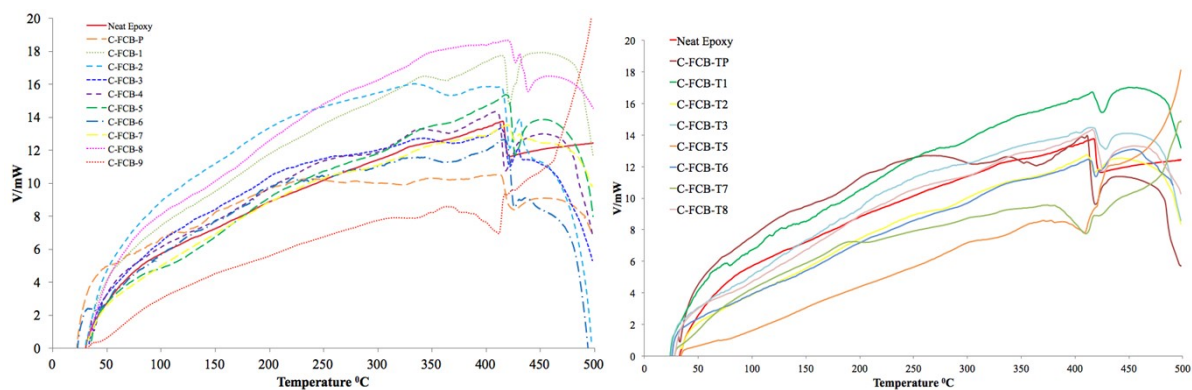

Figure S6: DSC profile of Neat epoxy, unmodified and modified FCB composites

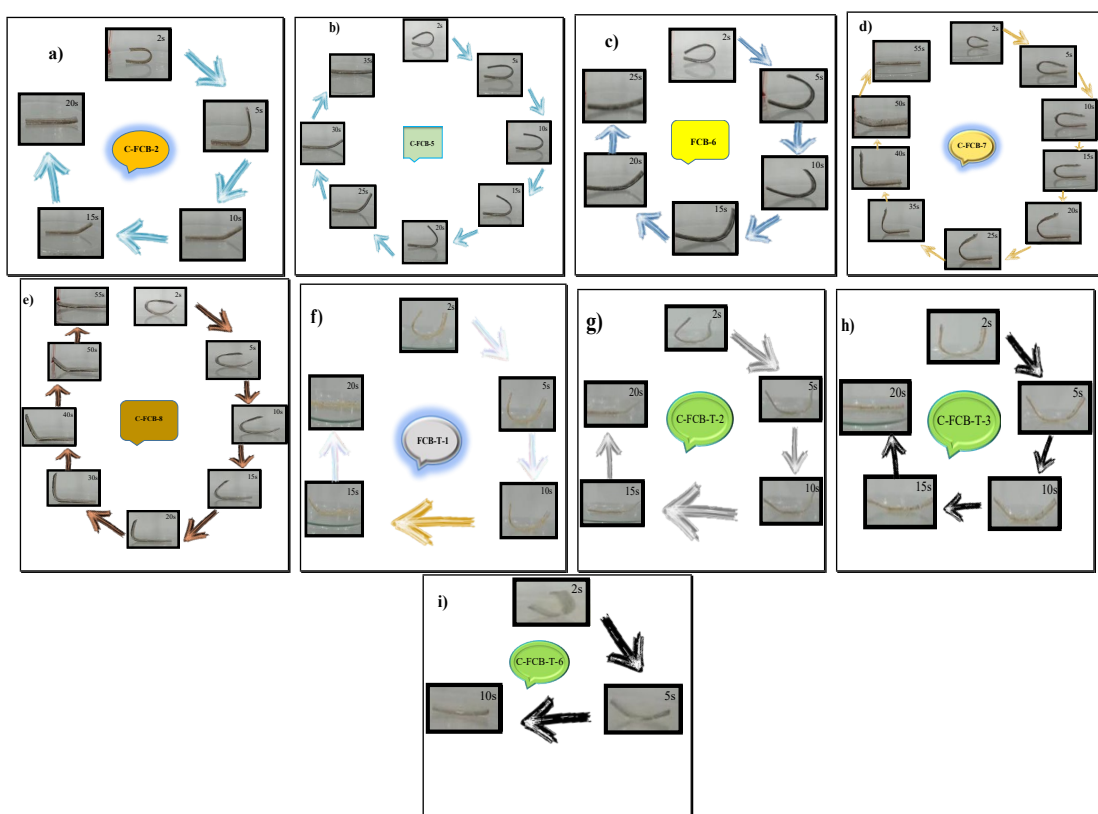

Figure S7: Shape recovery study of a) CFCB-2, b) CFCB-5 , c) CFCB-6, d) CFCB-7, e) CFCB-8, f) CFCB-T1, g) CFCB-T2, h) CFCB-T3 and i) CFCB-T6 composites

Table S1: Oxidation of FCB particles

| Sample ID | Modifier             | FCB:Modifier<br>(Mass ratio) |
|-----------|----------------------|------------------------------|
| FCB-1     | Bismuth trichloride  | 5:1                          |
| FCB-2     | Potassium Dichromate | 5:1                          |
| FCB-3     | Hydrogen peroxide    | 5:1                          |
| FCB-4     | Phenyl Hydrazinium   | 5:1                          |
| FCB-5     | Chloro Acetic Acid   | 5:1                          |
| FCB-6     | Hydrochloric acid    | 5:1                          |
| FCB-7     | Potassium Chlorate   | 5:1                          |
| FCB-8     | Sodium Azide         | 5:1                          |
| FCB-9     | HNO <sub>3</sub>     | 5:1                          |

Table S2: Thiolation of FCB particles

| Sample ID   | Precursor | FCB:S:Thio Urea<br>(Mass Ratio) |
|-------------|-----------|---------------------------------|
| FCB-TP      | FCB       | 1:1:0.2                         |
| FCB T1 – T9 | FCB 1-9   | 1:1:0.2                         |

Table S3: Weight loss profiles of unmodified and modified particles' composites

| Sample ID  | Temperature (°C) for Weight Loss |       |       |       | Mass %<br>(500 °C) |
|------------|----------------------------------|-------|-------|-------|--------------------|
|            | 2%                               | 5%    | 10%   | 50%   |                    |
| Neat Epoxy | 201.4                            | 318.0 | 355.0 | 417.5 | 04.0               |
| C-FCB-P    | 096.3                            | 174.8 | 284.4 | 418.4 | 18.8               |
| C-FCB-1    | 100.4                            | 163.3 | 282.6 | 423.7 | 20.5               |
| C-FCB-2    | 146.1                            | 225.6 | 327.3 | 422.0 | 19.5               |
| C-FCB-3    | 100.9                            | 155.4 | 268.3 | 424.2 | 24.9               |
| C-FCB-4    | 095.4                            | 155.8 | 247.7 | 417.6 | 19.6               |
| C-FCB-5    | 179.7                            | 280.1 | 349.7 | 429.0 | 26.7               |
| C-FCB-6    | 300.1                            | 344.2 | 381.8 | 431.7 | 32.2               |
| C-FCB-7    | 150.5                            | 228.4 | 323.7 | 434.1 | 34.0               |
| C-FCB-8    | 118.9                            | 181.3 | 235.2 | 431.5 | 31.2               |
| C-FCB-9    | 138.7                            | 234.8 | 323.2 | 419.7 | 24.5               |
| C-FCB-TP   | 118.8                            | 177.5 | 277.1 | 418.0 | 18.7               |
| C-FCB-T1   | 251.1                            | 330.3 | 384.8 | 433.4 | 32.2               |
| C-FCB-T2   | 096.6                            | 199.7 | 316.5 | 421.7 | 26.2               |
| C-FCB-T3   | 156.0                            | 231.1 | 370.3 | 430.0 | 28.7               |
| C-FCB-T5   | 097.8                            | 154.7 | 231.9 | 414.7 | 22.0               |
| C-FCB-T6   | 032.3                            | 059.4 | 087.6 | 402.8 | 00.2               |
| C-FCB-T7   | 038.2                            | 077.5 | 135.0 | 408.5 | 06.2               |
| C-FCB-T8   | 188.5                            | 244.4 | 313.8 | 424.0 | 18.9               |
